# Supplementary material
Source: publisher site journal article supplement (https://www.spandidos-publications.com/3586/downloadSupplementary)

Figure S1. Relative GAPDH expression was detected by (A) reverse transcription quantitative PCR and (B) western blotting. ns, non-significant; si, short interfering; NC, negative control.

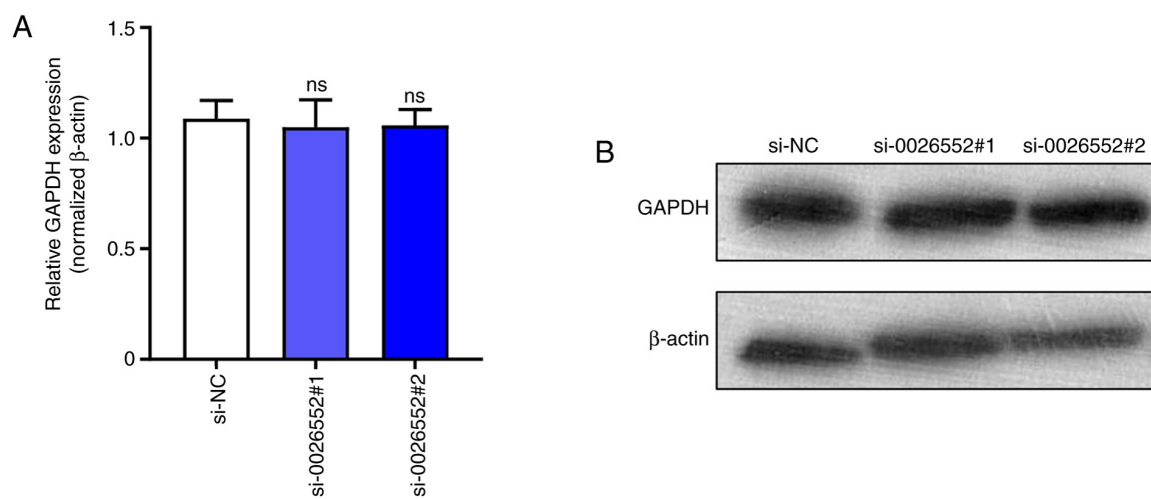

Figure S2. (A) RT-qPCR detected the expression level of miR-331-3p in HTR-8/Svneo cells transfected with miR-331-3p mimics. \*\* $P < 0.01$  vs. mimics-NC. (B) RT-qPCR detected the expression level of miR-331-3p in HTR-8/Svneo cells transfected with miR-331-3p inhibitor. \*\* $P < 0.01$  vs. inhibitor-NC. (C) RT-qPCR detected the expression level of TGF- $\beta$ 1 in HTR-8/Svneo cells transfected with si-TGF- $\beta$ 1. \*\* $P < 0.01$  vs. si-NC. RT-qPCR, reverse transcription quantitative PCR; miR, microRNA; si, short interfering; NC, negative control.

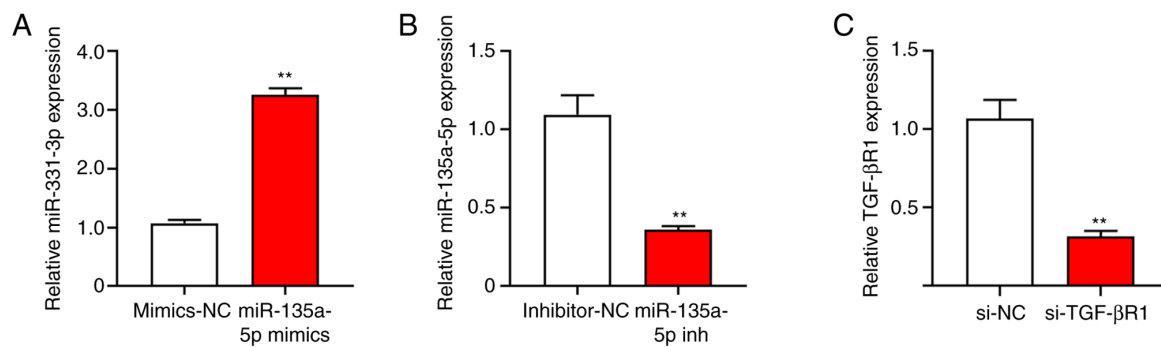

Supplement: Supplementary file 1 [file downloadSupplementary]
